# Supplementary material for: Fluorescent detection of silver ions in water with organic nano-aggregates
Source: Royal Society of Chemistry journal article supplement (doi:10.1039/c2ra21717a), 2012-01-01
Supplement: c2ra21717a.pdf [file c2ra21717a.pdf]

## Fluorescent detection of silver ions in water with organic nano-aggregates

Joydev Hatai, Suman Pal, Subhajit Bandyopadhyay\*

*Indian Institute of Science Education and Research (IISER) – Kolkata*

*BCKV Main Campus PO, Mohanpur, Nadia, WB 741252, India*

*sb1@iiserkol.ac.in*

---

### Contents

|                                                                                                       |   |
|-------------------------------------------------------------------------------------------------------|---|
| Figure (S1). UV-vis spectra : <b>1</b> with Hg <sup>2+</sup> in H <sub>2</sub> O/DMSO (99:1). .....   | 2 |
| Job's Plot (fluorescence method).....                                                                 | 2 |
| Figure (S2). MS spectrum of the chemosensor <b>1</b> .....                                            | 3 |
| Figure (S3). ESI-MS spectrum of complex [ <b>1</b> + Ag <sup>+</sup> ] from an aqueous sample. ....   | 4 |
| Figure(S4). ESI-MS spectrum of complex [ <b>1</b> + 2Ag <sup>+</sup> + MeOH + HO <sup>-</sup> ]...... | 4 |
| Figure (S5). Binding constant in MeOH:DMSO (99:1, v/v) . ....                                         | 5 |
| Figure (S6). Binding constant in H <sub>2</sub> O:DMSO (99:1, v/v) . ....                             | 5 |
| Figure(S7). Determination of detection limit .....                                                    | 6 |
| Figure (S8). <sup>1</sup> H-NMR spectrum of <b>1</b> .....                                            | 7 |
| Figure (S9). <sup>13</sup> C-NMR spectrum of <b>1</b> . ....                                          | 8 |

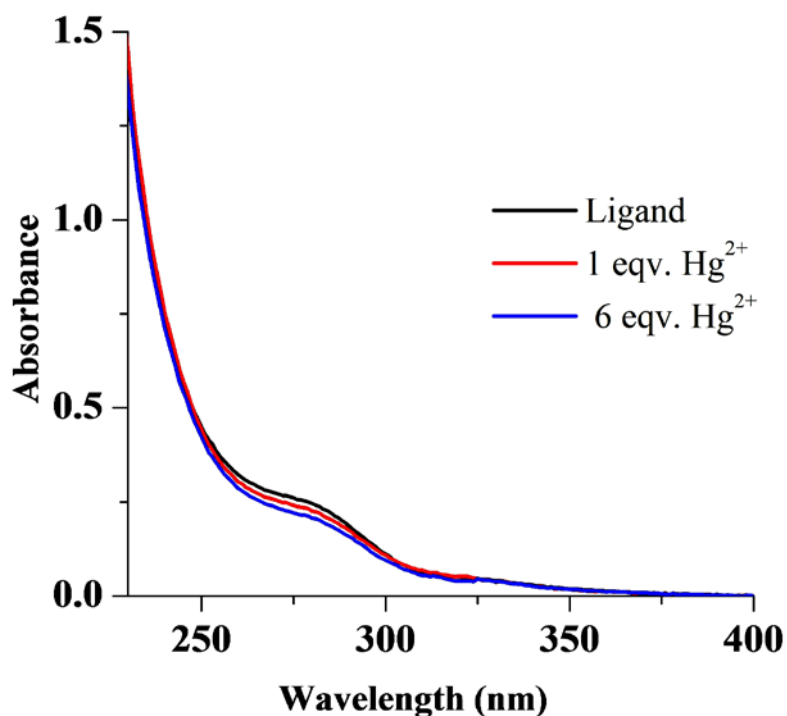

**Figure (S1).** UV-vis spectra : **1** with  $\text{Hg}^{2+}$  in  $\text{H}_2\text{O}/\text{DMSO}$  (99:1).

**Job's Plot (fluorescence method):** Stock solutions of **1** (10  $\mu\text{M}$ ) and silver nitrate (1 mM) were prepared separately in respective solvents. The fluorescence spectra was recorded for each of the 11 solutions containing the two solutions (**1** and  $\text{AgNO}_3$ ) at a total concentration of 80  $\mu\text{M}$  in  $\text{CH}_3\text{OH}/\text{DMSO}$  (99:1) and 8  $\mu\text{M}$  for  $\text{H}_2\text{O}/\text{DMSO}$  (99:1) in the following volume ratios. 2.0:0, 1.8:0.02, 1.6:0.04, 1.4:0.06, 1.2:0.08, 1.0:0.10, 0.8:0.12, 0.6:0.14, 0.4:0.16, 0.2:0.18, and 0.0:0.20.

S-3

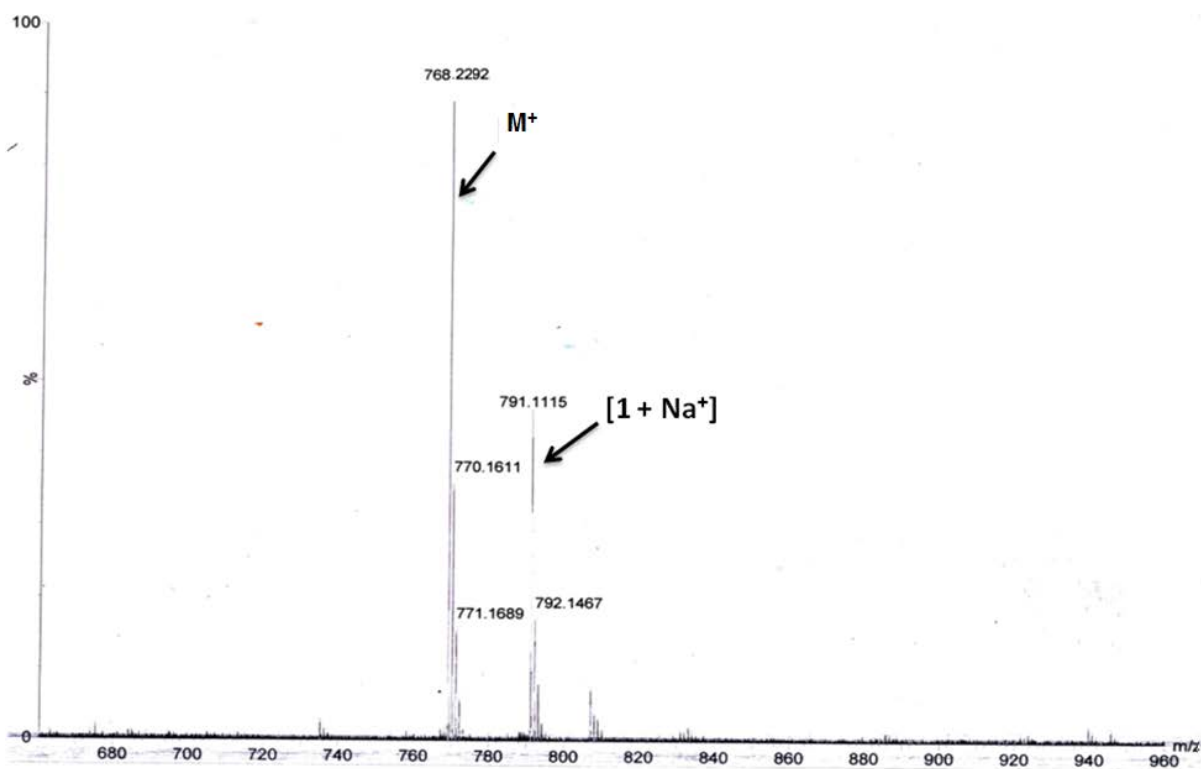

**Figure (S2).** ESI-MS of the chemosensor **1**.

S-4

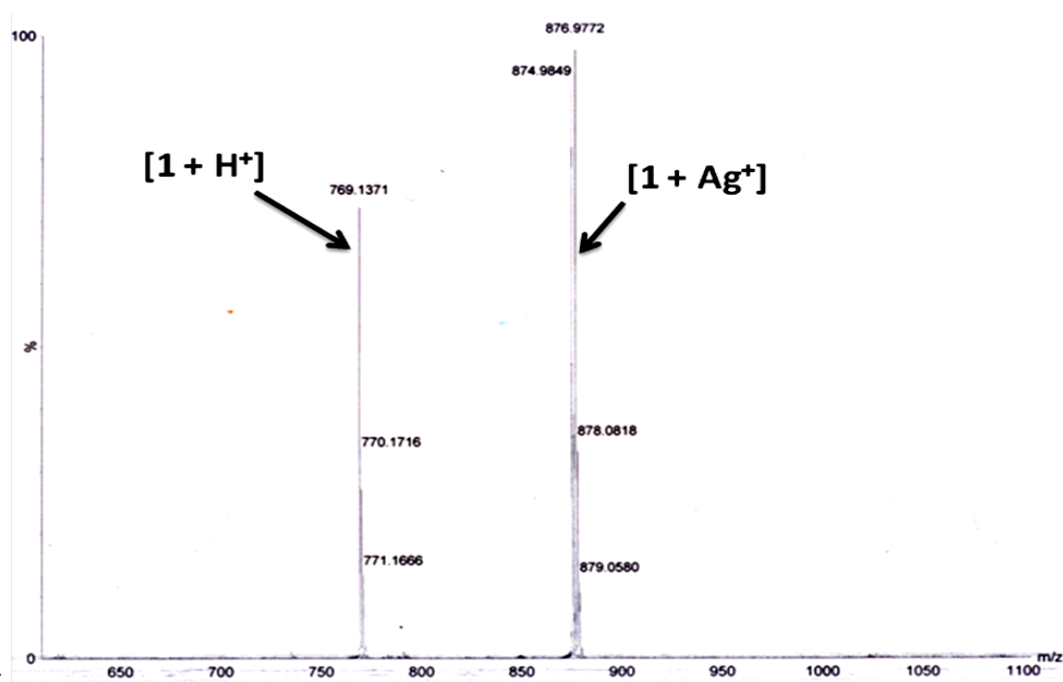

Figure (S3). ESI-MS spectrum of complex [ 1 + Ag<sup>+</sup> ] from an aqueous sample.

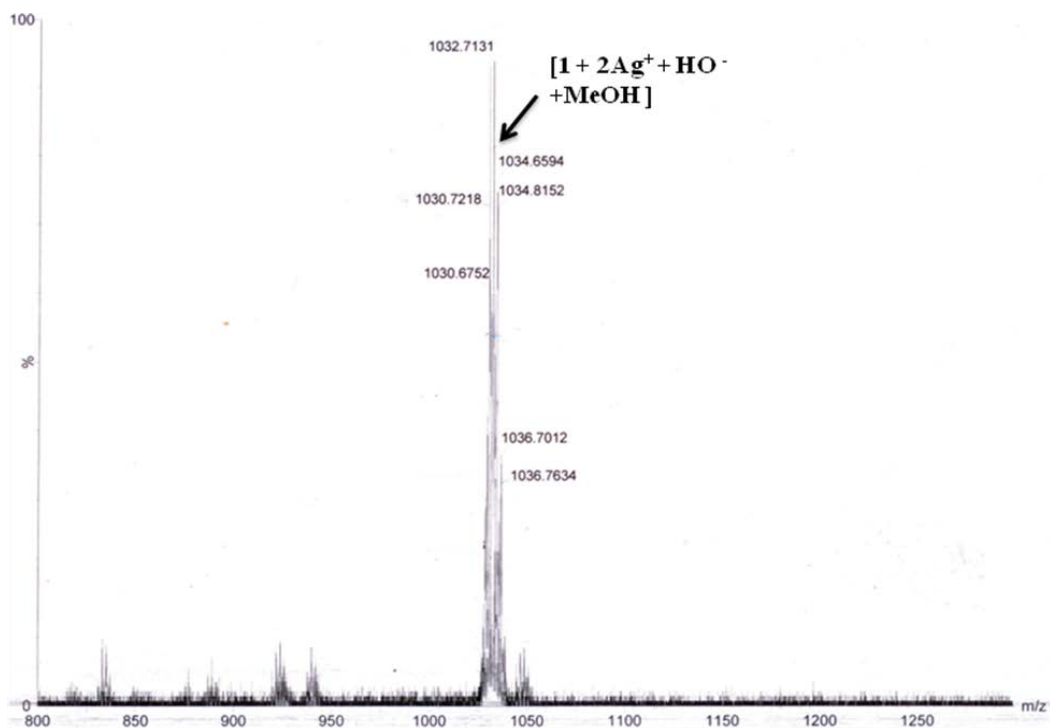

Figure(S4). ESI-MS spectrum of complex [ 1 + 2Ag<sup>+</sup> + MeOH + HO<sup>-</sup> ].

S-5

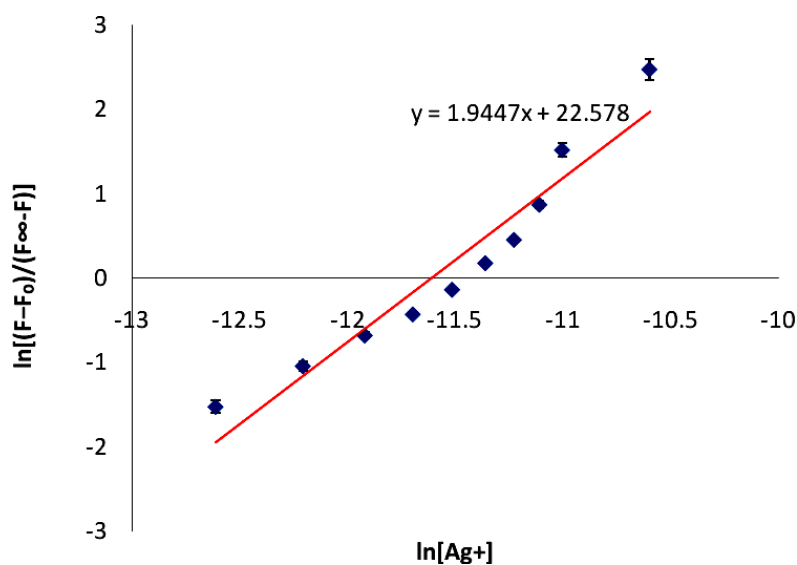

**Figure (S5).** Binding constant in MeOH:DMSO (99:1, v/v) was determined from the plot of  $\ln[(F-F_0)/(F_\infty-F)]$  against  $\ln[Ag^+]$ ; the stoichiometry of 1- $Ag^+$  association, obtained directly from the slope, is  $1.94 \cong 2$ . Following equation 1, the intercept gave an association constant of  $8.0 \times 10^5 M^{-2}$ . The error calculated from experiments performed in triplicate was 6%.

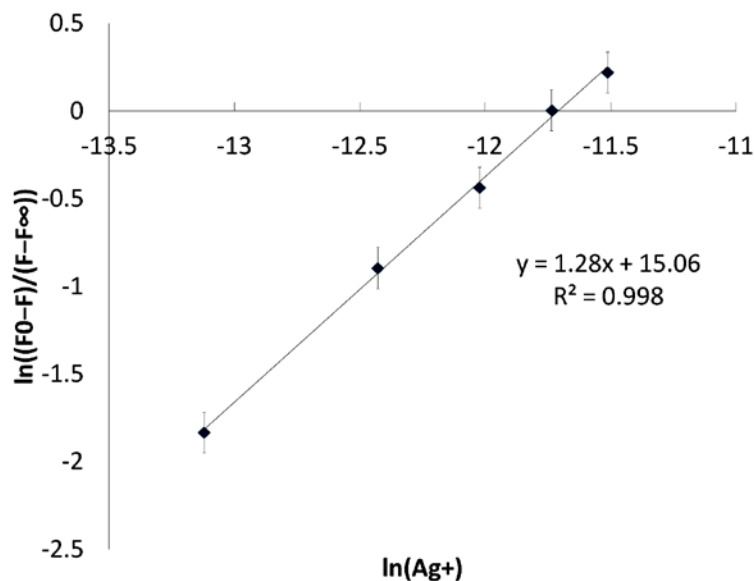

**Figure (S6).** Binding constant in H<sub>2</sub>O:DMSO (99:1, v/v) was determined from the plot of  $\ln[(F_0-F)/(F-F_\infty)]$  against  $\ln[Ag^+]$ ; the stoichiometry of 1- $Ag^+$  association, obtained from the slope, is 1.28. Following equation 1, the intercept gave an association constant of  $1.37 \times 10^6 M^{-1}$ . The error calculated from experiments performed in triplicate was 4%.

S-6

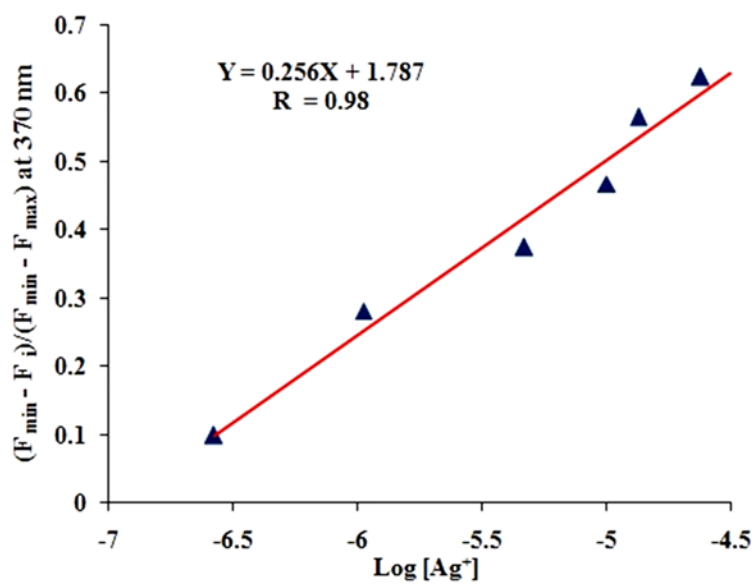

**Figure(S7).** Determination of detection limit from fluorescence intensity of chemosensor **1** in H<sub>2</sub>O/DMSO (99:1, v/v).

S-7

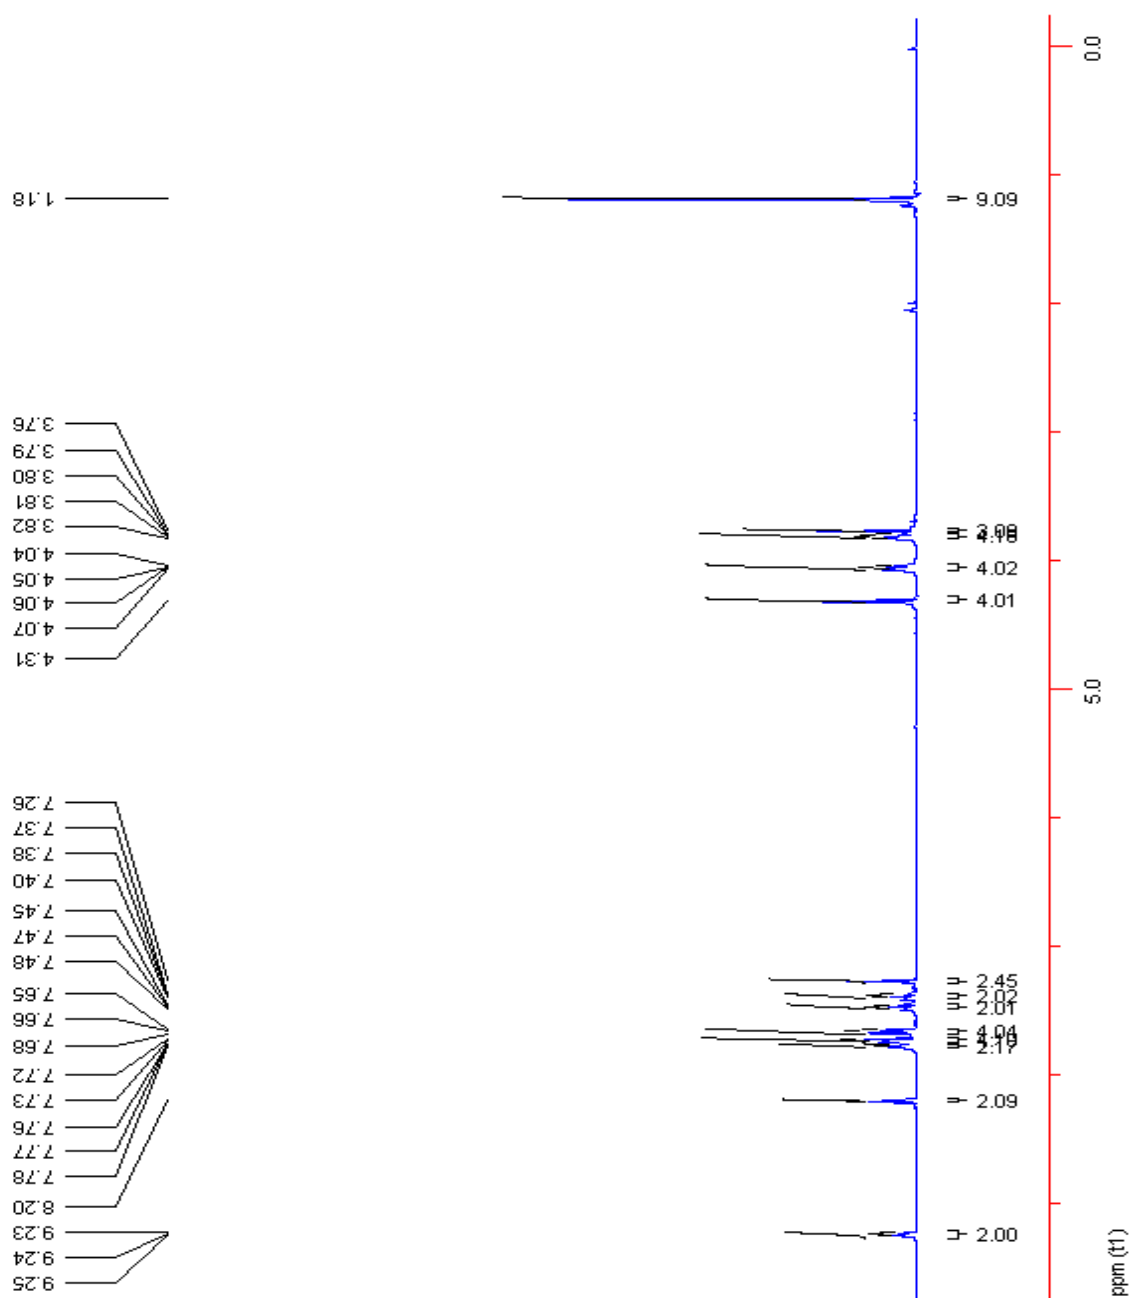

Figure (S8).  $^1\text{H-NMR}$  spectrum of **1**.

S-8

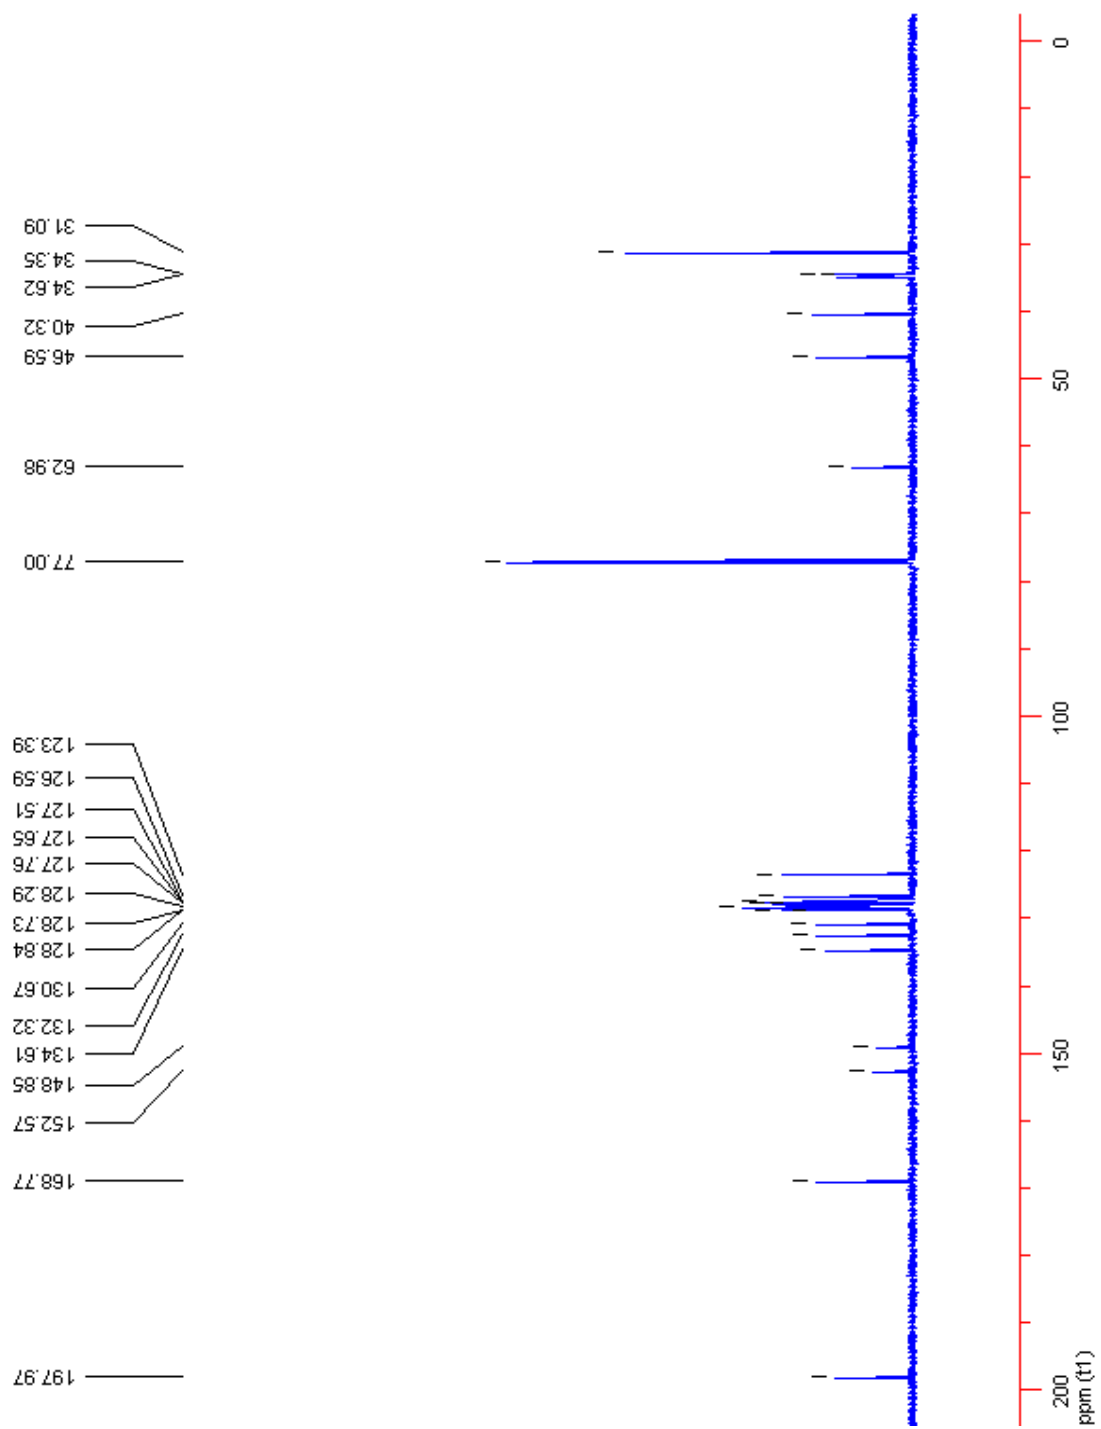

Figure (S9).  $^{13}\text{C}$ -NMR spectrum of **1**.
